# Supplementary material for: Dietary Characteristics of Elders with Frailty and with Mild Cognitive Impairment: Cross-Sectional Findings and Implications from the Nutrition and Health Survey in Taiwan 2014–2017
Source: MDPI journal article supplement (doi:10.3390/nu14245216), 2022-12-07
Supplement: s1 [file s1]

**Table S1: Total energy and nutrients intakes for the older men by frailty levels in 2014-2017 NAHSIT <sup>a</sup>**

|                     | 65-74 year-old men        |                          |                          |                                 |                | > 74 year-old men         |                          |                           |                                 |                |
|---------------------|---------------------------|--------------------------|--------------------------|---------------------------------|----------------|---------------------------|--------------------------|---------------------------|---------------------------------|----------------|
|                     | Robust                    | Prefrail                 | Frail                    | <i>P</i> for trend <sup>b</sup> |                | Robust                    | Prefrail                 | Frail                     | <i>P</i> for trend <sup>b</sup> |                |
|                     | (n=231)                   | (n=156)                  | (n=13)                   | <i>Model 1</i>                  | <i>Model 2</i> | (n=86)                    | (n=117)                  | (n=26)                    | <i>Model 1</i>                  | <i>Model 2</i> |
| Energy (Kcal)       | 2078.06±49.12<br>(107.4)  | 1952.8±74.79<br>(100.9)  | 1760.89±192.73<br>(91.7) | 0.114                           | 0.974          | 2163.77±122.69<br>(115.5) | 1888.42±107.84<br>(99.1) | 1840.41±179.71<br>(91.7)  | 0.158                           | 0.056          |
| Carbohydrate (g)    | 274.18±6.61<br>(210.8)    | 261.32±10.14<br>(201.2)  | 257.07±28.98<br>(198.8)  | 0.567                           | 0.232          | 280.6±9.21<br>(219)       | 252.27±13.12<br>(193.5)  | 244.69±21.92<br>(178.2)   | 0.179                           | 0.537          |
| Protein (g)         | 86.92±2.78<br>(153.8)     | 80.92±3.45<br>(143.5)    | 58.3±6.53<br>(103.1)     | <.001                           | 0.133          | 92.27±6.25<br>(155.3)     | 76.71±5.45<br>(127.6)    | 74.08±8.83<br>(118.7)     | 0.113                           | 0.294          |
| Fat (g)             | 69.07±2.79<br>(107.2)     | 63.61±3.91<br>(98.5)     | 57.24±11.35<br>(88.7)    | 0.311                           | 0.764          | 71.9±8.36<br>(115.1)      | 62.3±5.66<br>(98.1)      | 63.39±8.22<br>(95.1)      | 0.477                           | 0.117          |
| Vitamin A (µg RE)   | 1179.69±104.69<br>(194.7) | 1019.94±128.2<br>(172.1) | 989.07±220.62<br>(180.9) | 0.446                           | 0.963          | 1004.54±118.64<br>(170.2) | 980.31±121.56<br>(162.9) | 1278.28±301.22<br>(204.4) | 0.424                           | 0.323          |
| Vitamin C (mg)      | 184.52±9.76<br>(183.5)    | 171.41±17.69<br>(172.6)  | 56.45±18.19<br>(65.4)    | <.0001                          | <.0001         | 197.73±22.89<br>(198)     | 167.64±17.9<br>(167.6)   | 128.34±34.98<br>(127.5)   | 0.063                           | 0.083          |
| Vitamin D (µg)      | 7.1±0.65<br>(70.5)        | 7.19±0.74<br>(72.4)      | 7.07±3.64<br>(74.6)      | 0.994                           | 0.789          | 10.81±1.56<br>(104.1)     | 7.94±1.44<br>(80.1)      | 9.07±4.29<br>(103.3)      | 0.697                           | 0.969          |
| Vitamin E (mg α-TE) | 10.16±0.49<br>(84.1)      | 7.87±0.61<br>(66.3)      | 6.68±1.55<br>(60.6)      | 0.036                           | 0.331          | 10.49±0.79<br>(86.1)      | 7.83±0.68<br>(65.5)      | 8.69±1.39<br>(76.4)       | 0.271                           | 0.473          |
| Vitamin B1 (mg)     | 1.48±0.06<br>(122.4)      | 1.43±0.08<br>(120.4)     | 1.02±0.17<br>(94.2)      | 0.014                           | 0.310          | 1.53±0.1<br>(131)         | 1.42±0.12<br>(117.8)     | 1.42±0.21<br>(107.3)      | 0.616                           | 0.438          |
| Vitamin B2 (mg)     | 1.35±0.06<br>(103.1)      | 1.22±0.08<br>(94.4)      | 1.14±0.15<br>(93)        | 0.211                           | 0.888          | 1.38±0.1<br>(106.4)       | 1.15±0.09<br>(88.3)      | 1.26±0.26<br>(95.6)       | 0.670                           | 0.949          |
| Niacin (mg)         | 20.52±1.03<br>(128.2)     | 18.73±1.24<br>(117.1)    | 16.36±1.82<br>(103)      | 0.045                           | 0.758          | 19.31±1.35<br>(121.8)     | 18.73±1.4<br>(116.8)     | 14.77±1.94<br>(88.7)      | 0.060                           | 0.122          |
| Vitamin B6 (mg)     | 2.36±0.1<br>(147)         | 2.03±0.15<br>(127.6)     | 1.53±0.36<br>(101)       | 0.024                           | 0.285          | 2.48±0.14<br>(154.4)      | 1.89±0.13<br>(118.1)     | 1.7±0.23<br>(107.7)       | 0.008                           | 0.007          |

|                   |                            |                            |                            |        |       |                            |                            |                            |       |       |
|-------------------|----------------------------|----------------------------|----------------------------|--------|-------|----------------------------|----------------------------|----------------------------|-------|-------|
| Vitamin B12 (μg)  | 5.4±0.71<br>(224.4)        | 5.3±0.9<br>(221.4)         | 5.53±1.87<br>(233.7)       | 0.944  | 0.569 | 4.78±0.7<br>(202.7)        | 3.67±0.57<br>(152.2)       | 3±0.54<br>(113.4)          | 0.058 | 0.245 |
| Zinc (mg)         | 13.33±0.47<br>(88.7)       | 12.55±0.64<br>(83.8)       | 9.63±1<br>(65.2)           | 0.001  | 0.315 | 14.91±1.23<br>(100.7)      | 11.4±0.63<br>(75.8)        | 10.82±1.41<br>(68.1)       | 0.036 | 0.015 |
| Iron (mg)         | 16.63±0.72<br>(165.8)      | 13.97±0.92<br>(140.2)      | 12.43±1.22<br>(128.5)      | 0.004  | 0.170 | 17.39±1.65<br>(177.1)      | 13.65±0.84<br>(135.9)      | 15.49±2.75<br>(145)        | 0.556 | 0.841 |
| Sodium (mg)       | 3288.57±129.52<br>(137.5)  | 3281.1±247.11<br>(136.2)   | 2389.45±363.25<br>(95.8)   | 0.013  | 0.288 | 3668.86±345.53<br>(153.2)  | 3082.91±214.4<br>(128.4)   | 2787.23±584.5<br>(115.1)   | 0.200 | 0.420 |
| Potassium (mg)    | 3231.47±117.89<br>(94.6)   | 2692.77±158.8<br>(79.7)    | 2026.57±325.59<br>(63.6)   | 0.001  | 0.032 | 3351.44±223.41<br>(98.7)   | 2562.15±173.46<br>(75.3)   | 2692.59±562.29<br>(78.8)   | 0.314 | 0.538 |
| Phosphorus (mg)   | 1284.93±42<br>(160.3)      | 1170.26±53.83<br>(146.6)   | 867.95±77.2<br>(111.2)     | <.0001 | 0.059 | 1427.69±168.14<br>(179.2)  | 1107.64±70.08<br>(138.3)   | 1104.25±144.56<br>(135.7)  | 0.167 | 0.380 |
| Calcium (mg)      | 655.4±40.61<br>(65.2)      | 520.61±44.71<br>(52.5)     | 392.25±36.49<br>(42.2)     | <.0001 | 0.016 | 671.53±60.84<br>(67.3)     | 557.23±52.55<br>(55.7)     | 662.51±190.97<br>(65.9)    | 0.966 | 0.627 |
| Magnesium (mg)    | 377.67±14.11<br>(105.6)    | 295.92±18.09<br>(83.3)     | 221.43±18.41<br>(65.2)     | <.0001 | 0.003 | 430.08±58.48<br>(124.4)    | 293.62±16.19<br>(83.6)     | 339.34±65.59<br>(92.3)     | 0.309 | 0.665 |
| SFA (mg)          | 19590.99±843.81<br>(28.6)  | 19867.83±1130.71<br>(31.9) | 23459.64±7400.67<br>(37.3) | 0.605  | 0.166 | 20711.52±2432.81<br>(29.3) | 20682±1856.32<br>(33.6)    | 19667.18±2387.86<br>(32.1) | 0.759 | 0.025 |
| MUFA (mg)         | 25650.66±1171.31<br>(37)   | 23969.69±1469.13<br>(37.1) | 18628.55±2681.15<br>(34.7) | 0.019  | 0.422 | 27148.46±3572.94<br>(37)   | 23975.75±2327.48<br>(37.4) | 24779.39±3694.37<br>(38.1) | 0.641 | 0.090 |
| PUFA (mg)         | 23004.89±1097.35<br>(33.2) | 19342.99±1567.63<br>(30.2) | 14876.38±1970.33<br>(27.5) | <.001  | 0.175 | 23620.16±2955.37<br>(33.1) | 17216.94±1689.6<br>(28.2)  | 18368.23±3223.01<br>(28.9) | 0.240 | 0.948 |
| Cholesterol (mg)  | 264.81±13.38<br>(88.6)     | 291.72±18.35<br>(96.9)     | 179.26±46.37<br>(57.4)     | 0.083  | 0.356 | 252.64±22.31<br>(84.8)     | 247.37±23.39<br>(82.4)     | 215.4±38.23<br>(69.9)      | 0.419 | 0.879 |
| Dietary fiber (g) | 22.41±0.89<br>(82.6)       | 16.28±1.12<br>(60.8)       | 12.99±1.92<br>(51.5)       | <.0001 | <.001 | 23.1±2.11<br>(85.9)        | 16.78±1.41<br>(62.1)       | 18.74±2.98<br>(68.3)       | 0.252 | 0.483 |

<sup>a</sup> Data are age-adjusted Mean±SEM (% RDA). The RDAs are the current dietary reference intakes (DRIs, the 8th edition) established for Taiwanese people.

<sup>b</sup> The trend test was performed by using the general linear model to test whether the mean of variable has an ordered relationship across frailty level groups after adjusting for age (Model 1) or for age and energy intake (Model 2).

**Table S2: Total energy and nutrients intakes for the older men by stages of cognitive ability in 2014-2017 NAHSIT <sup>a</sup>**

|                     | 65-74 year-old men        |                          |                         |                                 |                | > 74 year-old men         |                           |                          |                                 |                |
|---------------------|---------------------------|--------------------------|-------------------------|---------------------------------|----------------|---------------------------|---------------------------|--------------------------|---------------------------------|----------------|
|                     | Normal cognition          | Mild cognitive           | Cognitive               | <i>P</i> for trend <sup>b</sup> |                | Normal cognition          | Mild cognitive            | Cognitive                | <i>P</i> for trend <sup>b</sup> |                |
|                     | (n=291)                   | impairment<br>(n=181)    | impairment<br>(n=59)    | <i>Model 1</i>                  | <i>Model 2</i> | (n=112)                   | impairment<br>(n=102)     | impairment<br>(n=110)    | <i>Model 1</i>                  | <i>Model 2</i> |
| Energy (Kcal)       | 2044.68±43.04<br>(105.9)  | 1872.27±65.68<br>(96.6)  | 1828.5±171.93<br>(93.8) | 0.254                           | 0.350          | 1945.18±88.32<br>(103.1)  | 2045.03±135.37<br>(107.2) | 1769.64±125.38<br>(92.8) | 0.267                           | 0.910          |
| Carbohydrate (g)    | 271.15±7.05<br>(209.2)    | 250.19±9.59<br>(191.8)   | 248.7±17.74<br>(189.4)  | 0.249                           | 0.902          | 260.18±10.24<br>(201.7)   | 270.67±13.32<br>(207.3)   | 236.61±12.68<br>(181.3)  | 0.151                           | 0.329          |
| Protein (g)         | 85.15±2.66<br>(151.8)     | 76.62±2.63<br>(135.1)    | 76.37±9.85<br>(133.4)   | 0.410                           | 0.910          | 82.12±4.57<br>(137.5)     | 82±5.58<br>(136.3)        | 72.47±6.85<br>(120.5)    | 0.256                           | 0.600          |
| Fat (g)             | 67.61±2.3<br>(105.1)      | 61.23±3.4<br>(94.7)      | 56.78±8.86<br>(87)      | 0.274                           | 0.643          | 62.82±5<br>(99.5)         | 67.57±8.83<br>(106.5)     | 58.33±6.28<br>(92)       | 0.596                           | 0.182          |
| Vitamin A (µg RE)   | 1166.27±101.18<br>(191.5) | 983.89±113.88<br>(166.7) | 758.93±204.97<br>(135)  | 0.091                           | 0.126          | 1018.43±102.72<br>(168.9) | 1018.03±94.19<br>(170.1)  | 944.24±145.83<br>(157.7) | 0.657                           | 0.872          |
| Vitamin C (mg)      | 171.11±9.69<br>(170.4)    | 151.47±10.9<br>(152.1)   | 142.48±26.24<br>(144.6) | 0.313                           | 0.614          | 181.85±15.51<br>(182.7)   | 150.83±16.94<br>(150.3)   | 133.03±15.29<br>(132.7)  | 0.028                           | 0.036          |
| Vitamin D (µg)      | 7.36±0.61<br>(72.6)       | 6.8±0.67<br>(68.9)       | 5.86±1.76<br>(61.3)     | 0.439                           | 0.647          | 10.06±1.63<br>(98.9)      | 8.23±1.2<br>(83.3)        | 8.19±1.63<br>(82.6)      | 0.433                           | 0.635          |
| Vitamin E (mg α-TE) | 9.6±0.35<br>(79.7)        | 7.97±0.48<br>(66.8)      | 7.02±0.98<br>(59.7)     | 0.021                           | 0.011          | 8.77±0.64<br>(72.5)       | 9.07±0.77<br>(75.9)       | 8.52±0.9<br>(71.2)       | 0.819                           | 0.696          |
| Vitamin B1 (mg)     | 1.46±0.05<br>(121.2)      | 1.29±0.06<br>(108)       | 1.23±0.16<br>(105.5)    | 0.211                           | 0.389          | 1.44±0.08<br>(120.7)      | 1.4±0.08<br>(115.9)       | 1.36±0.17<br>(112.6)     | 0.658                           | 0.801          |
| Vitamin B2 (mg)     | 1.32±0.07<br>(100.8)      | 1.15±0.05<br>(89.5)      | 0.98±0.14<br>(78.2)     | 0.027                           | 0.011          | 1.17±0.06<br>(89.5)       | 1.28±0.08<br>(98.4)       | 1.11±0.11<br>(85.3)      | 0.614                           | 0.746          |
| Niacin (mg)         | 19.83±0.9<br>(124.6)      | 17.09±1.01<br>(106.2)    | 21.11±3.99<br>(129.9)   | 0.755                           | 0.393          | 19.2±1.25<br>(120.6)      | 17.01±1.46<br>(106)       | 15.83±1.82<br>(98.6)     | 0.144                           | 0.189          |
| Vitamin B6 (mg)     | 2.28±0.08                 | 1.97±0.11                | 1.78±0.27               | 0.082                           | 0.161          | 2.11±0.15                 | 1.98±0.08                 | 1.86±0.18                | 0.316                           | 0.486          |

|                   |                 |                  |               |       |       |                  |                |                  |       |       |
|-------------------|-----------------|------------------|---------------|-------|-------|------------------|----------------|------------------|-------|-------|
|                   | (141.7)         | (123.6)          | (112.6)       |       |       | (131.9)          | (123.6)        | (116.4)          |       |       |
| Vitamin B12 (μg)  | 5.64±0.79       | 4.18±0.38        | 3.61±0.71     | 0.066 | 0.207 | 4.34±0.56        | 3.92±0.48      | 3.53±0.65        | 0.357 | 0.593 |
|                   | (234.6)         | (174.6)          | (151.8)       |       |       | (182.9)          | (162)          | (146.1)          |       |       |
| Zinc (mg)         | 12.93±0.42      | 11.84±0.6        | 11.93±1.22    | 0.452 | 0.450 | 12.07±0.57       | 13.25±1.06     | 10.86±0.86       | 0.238 | 0.688 |
|                   | (86.5)          | (78.6)           | (78.7)        |       |       | (81.4)           | (87.8)         | (72)             |       |       |
| Iron (mg)         | 15.81±0.61      | 13.52±0.63       | 13.61±1.99    | 0.306 | 0.651 | 15.08±0.76       | 15.51±1.37     | 13.36±1.09       | 0.182 | 0.630 |
|                   | (157.7)         | (135.6)          | (137.3)       |       |       | (152.2)          | (154.2)        | (133)            |       |       |
| Sodium (mg)       | 3169.46±130.9   | 3410.61±202.59   | 2611.1±332.99 | 0.089 | 0.185 | 2977.12±250.65   | 3111.21±281.45 | 2987.22±261.32   | 0.976 | 0.322 |
|                   | (133.6)         | (140.6)          | (104.2)       |       |       | (124.3)          | (129.5)        | (124.3)          |       |       |
| Potassium (mg)    | 3073.49±98.39   | 2583.9±126.71    | 2312.1±348.14 | 0.047 | 0.016 | 2923.83±156.27   | 2729.76±161.19 | 2572.11±271.67   | 0.279 | 0.506 |
|                   | (89.9)          | (76.4)           | (69.4)        |       |       | (86.2)           | (80.2)         | (75.6)           |       |       |
| Phosphorus (mg)   | 1245.55±39.03   | 1094.01±39.2     | 1081.3±124.46 | 0.227 | 0.443 | 1162.3±53.52     | 1348.24±139.98 | 1047.08±89.96    | 0.289 | 0.926 |
|                   | (155.6)         | (136.8)          | (135.3)       |       |       | (146.1)          | (168.1)        | (130.5)          |       |       |
| Calcium (mg)      | 622.15±33.61    | 506.05±32.92     | 520.38±93.66  | 0.315 | 0.551 | 565.2±37.02      | 653.71±50.37   | 546.02±56.65     | 0.771 | 0.603 |
|                   | (61.8)          | (51)             | (53.3)        |       |       | (56.3)           | (65.5)         | (54.7)           |       |       |
| Magnesium (mg)    | 369.23±13.87    | 284.78±12.73     | 260±34.11     | 0.006 | <.001 | 332.88±14.82     | 380.39±52.57   | 285.16±26.11     | 0.104 | 0.642 |
|                   | (103.1)         | (80.2)           | (74)          |       |       | (96.2)           | (108.1)        | (81)             |       |       |
| SFA (mg)          | 19995.49±685.75 | 18842.82±1198.72 | 16914±2553    | 0.278 | 0.642 | 19456.94±1425.06 | 20160.4±2582.4 | 17809.21±2316.03 | 0.566 | 0.570 |
|                   | (29.8)          | (30.8)           | (30.1)        |       |       | (31.5)           | (30.4)         | (31)             |       |       |
| MUFA (mg)         | 25294.29±960.03 | 23038.95±1196.66 | 21424±3654.4  | 0.345 | 0.809 | 23671.54±2165.49 | 26187.8±3791.7 | 21799.53±2676.89 | 0.605 | 0.299 |
|                   | (37)            | (37.7)           | (37.5)        |       |       | (37.1)           | (37.9)         | (36.9)           |       |       |
| PUFA (mg)         | 21603.16±951.42 | 18867.49±1334.4  | 18079.8±2742  | 0.260 | 0.697 | 19274.73±1613.76 | 20851.2±3052.6 | 18262.92±1905.55 | 0.689 | 0.249 |
|                   | (32.1)          | (30.6)           | (31.7)        |       |       | (30.7)           | (31)           | (31.2)           |       |       |
| Cholesterol (mg)  | 265.37±14.49    | 294.58±22.26     | 237.22±31.19  | 0.369 | 0.834 | 237.63±20.52     | 241.68±17.74   | 233.13±29.66     | 0.907 | 0.551 |
|                   | (88.9)          | (97.8)           | (77.8)        |       |       | (79.2)           | (80.5)         | (77.7)           |       |       |
| Dietary fiber (g) | 20.73±0.84      | 16.02±0.88       | 16.33±2.6     | 0.123 | 0.261 | 21.06±1.19       | 19.15±1.9      | 14.2±1.27        | <.001 | <.001 |
|                   | (76.5)          | (59.6)           | (61.2)        |       |       | (78.2)           | (70.8)         | (52.5)           |       |       |

<sup>a</sup> Data are age-adjusted Mean±SEM (% RDA). The RDAs are the current dietary reference intakes (DRIs, the 8th edition) established for Taiwanese people.

<sup>b</sup> The trend test was performed by using the general linear model to test whether the mean of variable has an ordered relationship across frailty level groups after adjusting for age (Model 1) or for age and energy

intake (Model 2).

**Table S3: Total energy and nutrients intakes for the older women by frailty levels in 2014-2017 NAHSIT <sup>a</sup>**

|                     | 65-74 year-old women    |                           |                            |                                 |                | > 74 year-old women       |                         |                          |                                 |                |
|---------------------|-------------------------|---------------------------|----------------------------|---------------------------------|----------------|---------------------------|-------------------------|--------------------------|---------------------------------|----------------|
|                     | Robust                  | Prefrail                  | Frail                      | <i>P</i> for trend <sup>b</sup> |                | Robust                    | Prefrail                | Frail                    | <i>P</i> for trend <sup>b</sup> |                |
|                     | (n=224)                 | (n=127)                   | (n=10)                     | <i>Model 1</i>                  | <i>Model 2</i> | (n=60)                    | (n=109)                 | (n=27)                   | <i>Model 1</i>                  | <i>Model 2</i> |
| Energy (Kcal)       | 1697.46±61.18<br>(108)  | 1629.34±62.04<br>(103.8)  | 1425.63±106.08<br>(91.6)   | 0.027                           | 0.954          | 1483.5±66.16<br>(99.9)    | 1312.88±66.19<br>(87.5) | 1245.79±117.38<br>(81.6) | 0.085                           | 0.872          |
| Carbohydrate (g)    | 236.92±7.06<br>(182.5)  | 227.44±8.75<br>(174.5)    | 214.75±11.07<br>(161.6)    | 0.086                           | 0.325          | 215.94±8.72<br>(168.6)    | 182.93±8.58<br>(140.7)  | 166.97±16.23<br>(124.7)  | 0.011                           | 0.023          |
| Protein (g)         | 71.57±2.94<br>(143.2)   | 69.29±4.3<br>(138.5)      | 55.57±7.46<br>(110.7)      | 0.046                           | 0.319          | 60.74±3.44<br>(123)       | 52.41±3.5<br>(104.8)    | 50.91±4.44<br>(99.5)     | 0.069                           | 0.916          |
| Fat (g)             | 54.11±3.01<br>(103.2)   | 50.52±3.38<br>(96.6)      | 40.95±6.27<br>(80.8)       | 0.059                           | 0.704          | 42.62±3.43<br>(85.4)      | 42.61±3.48<br>(85.2)    | 43.08±6.36<br>(86)       | 0.950                           | 0.006          |
| Vitamin A (µg RE)   | 1110.77±93.27<br>(222)  | 1229.68±212.12<br>(246.1) | 1672.15±1111.15<br>(335.9) | 0.616                           | 0.508          | 1625.58±547.56<br>(344.3) | 820.1±125.87<br>(163.5) | 893.29±184.01<br>(149.8) | 0.180                           | 0.255          |
| Vitamin C (mg)      | 200.14±14.62<br>(200.7) | 165.03±14.78<br>(164.2)   | 108.65±14.11<br>(101.3)    | <.0001                          | 0.001          | 157.03±21.31<br>(159)     | 112.64±12.67<br>(112.6) | 110.11±28.32<br>(107.2)  | 0.212                           | 0.256          |
| Vitamin D (µg)      | 5.85±0.56<br>(58.2)     | 6.91±0.87<br>(69.5)       | 4.27±1.04<br>(45.3)        | 0.227                           | 0.622          | 5.03±1.02<br>(52)         | 5.21±0.71<br>(52.1)     | 4.73±1.23<br>(44.8)      | 0.845                           | 0.642          |
| Vitamin E (mg α-TE) | 8.5±0.51<br>(70.7)      | 8.19±0.58<br>(68.4)       | 8.72±1.62<br>(74)          | 0.902                           | 0.321          | 6.81±0.88<br>(58.2)       | 6.67±0.56<br>(55.6)     | 6.27±0.95<br>(50.2)      | 0.673                           | 0.432          |
| Vitamin B1 (mg)     | 1.28±0.06<br>(142.6)    | 1.24±0.08<br>(137.8)      | 1.19±0.17<br>(129.5)       | 0.621                           | 0.606          | 1.07±0.09<br>(119.7)      | 0.95±0.08<br>(106.1)    | 0.98±0.17<br>(107.6)     | 0.629                           | 0.571          |
| Vitamin B2 (mg)     | 1.15±0.06<br>(114.8)    | 1.17±0.09<br>(117.5)      | 1.24±0.25<br>(125.8)       | 0.696                           | 0.284          | 1.15±0.09<br>(115.8)      | 0.89±0.07<br>(89)       | 0.99±0.13<br>(97.5)      | 0.284                           | 0.969          |
| Niacin (mg)         | 15.75±0.61<br>(112.4)   | 15.11±0.8<br>(108)        | 9.95±1<br>(71.6)           | <.0001                          | 0.001          | 14.4±1.25<br>(102.6)      | 11.15±0.91<br>(79.6)    | 12.24±1.53<br>(87.8)     | 0.334                           | 0.915          |
| Vitamin B6 (mg)     | 1.91±0.09               | 1.89±0.13                 | 1.42±0.17                  | 0.009                           | 0.408          | 1.68±0.14                 | 1.35±0.07               | 1.31±0.15                | 0.062                           | 0.344          |

|                   |                  |                  |                  |       |       |                  |                  |                  |       |       |
|-------------------|------------------|------------------|------------------|-------|-------|------------------|------------------|------------------|-------|-------|
|                   | (119.1)          | (118)            | (88.8)           |       |       | (106.7)          | (84.3)           | (79.2)           |       |       |
| Vitamin B12 (μg)  | 3.63±0.33        | 3.93±0.44        | 1.68±0.4         | 0.001 | 0.016 | 4.36±1           | 3.59±0.77        | 6.36±3.73        | 0.621 | 0.543 |
|                   | (150.3)          | (165.2)          | (81.9)           |       |       | (193.1)          | (149.3)          | (247.5)          |       |       |
| Zinc (mg)         | 11.17±0.49       | 10.56±0.52       | 8±1.24           | 0.020 | 0.133 | 10.41±0.92       | 8.09±0.46        | 7.96±0.76        | 0.028 | 0.199 |
|                   | (93.1)           | (88)             | (66.6)           |       |       | (89.1)           | (67.3)           | (62.8)           |       |       |
| Iron (mg)         | 14.55±0.73       | 14.49±1.44       | 11.84±1.67       | 0.140 | 0.848 | 13.44±0.74       | 11.02±0.75       | 11.22±1.33       | 0.153 | 0.657 |
|                   | (145.4)          | (145.1)          | (119.6)          |       |       | (139.8)          | (110.1)          | (104.3)          |       |       |
| Sodium (mg)       | 2668.7±151.7     | 2829.44±176.11   | 2278.65±262.14   | 0.190 | 1.000 | 2223.44±153.65   | 2488.19±262.51   | 2121.46±247.93   | 0.739 | 0.421 |
|                   | (111.4)          | (117.6)          | (92.5)           |       |       | (94)             | (103.6)          | (86.3)           |       |       |
| Potassium (mg)    | 2891.03±131.49   | 2734.68±201.87   | 1879.99±318.67   | 0.004 | 0.116 | 2591.76±149.49   | 1964.94±128.38   | 1718.82±237.82   | 0.003 | 0.005 |
|                   | (111.2)          | (105.2)          | (72.8)           |       |       | (101.2)          | (75.5)           | (63.9)           |       |       |
| Phosphorus (mg)   | 1096.87±47.31    | 1042.49±57.85    | 827.36±62.68     | 0.001 | 0.099 | 935.7±42.3       | 819.64±52.07     | 761.21±75.54     | 0.042 | 0.499 |
|                   | (137.1)          | (130.3)          | (103.5)          |       |       | (118.2)          | (102.4)          | (93.3)           |       |       |
| Calcium (mg)      | 593.53±45.48     | 603.9±76.97      | 501.51±108.51    | 0.438 | 0.828 | 588.71±40.95     | 461.87±44.43     | 434.62±78.85     | 0.085 | 0.297 |
|                   | (59.4)           | (60.4)           | (50)             |       |       | (60.7)           | (46.1)           | (40.7)           |       |       |
| Magnesium (mg)    | 344.06±16.17     | 305.9±21.77      | 224.27±25.45     | <.001 | 0.031 | 277.68±11.91     | 234.6±15.95      | 209.34±25.54     | 0.024 | 0.114 |
|                   | (112.1)          | (99.4)           | (71.9)           |       |       | (94.8)           | (78.1)           | (66.4)           |       |       |
| SFA (mg)          | 15581.82±1011.76 | 14953.82±969.56  | 11007.63±1736.63 | 0.025 | 0.370 | 12682.14±1027.16 | 13007.56±1113.73 | 13148.6±2478.6   | 0.863 | 0.046 |
|                   | (29.1)           | (30.1)           | (26.9)           |       |       | (29.9)           | (30.4)           | (30.6)           |       |       |
| MUFA (mg)         | 20770.1±1209.46  | 18533.51±1141.02 | 13677.85±2294.25 | 0.007 | 0.042 | 15781.49±1232.9  | 15592.15±1442.76 | 15675.46±2406.56 | 0.969 | 0.013 |
|                   | (38)             | (36.5)           | (34.1)           |       |       | (37.3)           | (35.7)           | (35.7)           |       |       |
| PUFA (mg)         | 17285.58±1085.02 | 16675.59±1548.92 | 15621.37±2931.9  | 0.597 | 0.313 | 13829.31±1358.5  | 13553.26±1076.44 | 13958.6±1876.03  | 0.957 | 0.040 |
|                   | (32)             | (32.6)           | (37.1)           |       |       | (31.9)           | (32.6)           | (32.8)           |       |       |
| Cholesterol (mg)  | 207.85±17.53     | 258.57±26.24     | 161.39±62.77     | 0.470 | 0.965 | 193.56±33.81     | 162.93±22.06     | 202.05±29.48     | 0.836 | 0.216 |
|                   | (69.3)           | (86.2)           | (53.5)           |       |       | (65.6)           | (54.3)           | (65.8)           |       |       |
| Dietary fiber (g) | 21.53±0.87       | 19.26±1.36       | 12.08±2.28       | <.001 | 0.009 | 16.49±1          | 13.43±1.07       | 13.09±2.01       | 0.196 | 0.554 |
|                   | (99.1)           | (88.7)           | (55.6)           |       |       | (80.8)           | (63.9)           | (59)             |       |       |

<sup>a</sup> Data are age-adjusted Mean±SEM (% RDA). The RDAs are the current dietary reference intakes (DRIs, the 8th edition) established for Taiwanese people.

<sup>b</sup> The trend test was performed by using the general linear model to test whether the mean of variable has an ordered relationship across frailty level groups after adjusting for age (Model 1) or for age and energy

intake (Model 2).

**Table S4: Total energy and nutrients intakes for the older women by stages of cognitive ability in 2014-2017 NAHSIT <sup>a</sup>**

|                     | 65-74 year-old women      |                           |                          |                                 |                | > 74 year-old women       |                         |                         |                                 |                |
|---------------------|---------------------------|---------------------------|--------------------------|---------------------------------|----------------|---------------------------|-------------------------|-------------------------|---------------------------------|----------------|
|                     | Normal cognition          | Mild cognitive            | Cognitive                | <i>P</i> for trend <sup>b</sup> |                | Normal cognition          | Mild cognitive          | Cognitive               | <i>P</i> for trend <sup>b</sup> |                |
|                     | (n=202)                   | impairment<br>(n=164)     | impairment<br>(n=132)    | <i>Model 1</i>                  | <i>Model 2</i> | (n=41)                    | impairment<br>(n=87)    | impairment<br>(n=200)   | <i>Model 1</i>                  | <i>Model 2</i> |
| Energy (Kcal)       | 1761.58±60.54<br>(112.2)  | 1530.65±72.96<br>(97.8)   | 1408.65±46.63<br>(90.5)  | <.0001                          | 0.971          | 1593.77±127.34<br>(108.6) | 1383.28±72.93<br>(92.5) | 1314.19±49.97<br>(86.9) | 0.043                           | 0.973          |
| Carbohydrate (g)    | 245.94±7.18<br>(189.4)    | 210.29±8.74<br>(161.7)    | 206.79±7.47<br>(158.6)   | <.001                           | 0.878          | 212.27±13.38<br>(168.4)   | 191.35±8.04<br>(147.8)  | 190.11±7.96<br>(144.7)  | 0.178                           | 0.387          |
| Protein (g)         | 73.97±3.15<br>(147.8)     | 66.27±4.02<br>(132.6)     | 58.26±3.36<br>(116.8)    | 0.001                           | 0.748          | 67.16±3.65<br>(136.5)     | 58.74±5.55<br>(117.7)   | 52.33±2.76<br>(104)     | 0.002                           | 0.705          |
| Fat (g)             | 57.01±2.83<br>(108.8)     | 49.54±3.46<br>(95)        | 38.22±2.6<br>(74.2)      | <.0001                          | 0.157          | 50.4±5.17<br>(102.2)      | 44.28±4.98<br>(88.7)    | 38.92±2.45<br>(77.4)    | 0.041                           | 0.933          |
| Vitamin A (µg RE)   | 1207.19±118.45<br>(241.3) | 1170.65±136.69<br>(234.1) | 888.15±105.98<br>(177.9) | 0.027                           | 0.572          | 1763.17±809.52<br>(373.6) | 962.85±82.77<br>(195.1) | 827.76±89.37<br>(159.1) | 0.246                           | 0.339          |
| Vitamin C (mg)      | 202.25±16.19<br>(202.3)   | 176.78±14.84<br>(176.8)   | 120.33±10.3<br>(120.2)   | <.001                           | 0.014          | 153.21±18.01<br>(154.7)   | 134.68±13.05<br>(134.9) | 102.51±10.28<br>(102)   | 0.013                           | 0.047          |
| Vitamin D (µg)      | 6.11±0.69<br>(60.8)       | 6.38±1.09<br>(63.8)       | 5.15±0.76<br>(52.1)      | 0.418                           | 0.802          | 4.09±0.61<br>(45.2)       | 6.28±1.03<br>(63.3)     | 5.28±0.59<br>(51.5)     | 0.175                           | 0.012          |
| Vitamin E (mg α-TE) | 8.65±0.45<br>(72)         | 8.04±0.52<br>(67.1)       | 6.35±0.44<br>(53.2)      | 0.001                           | 0.247          | 7.34±0.92<br>(63.4)       | 7.29±0.74<br>(61)       | 6.32±0.39<br>(52)       | 0.288                           | 0.847          |
| Vitamin B1 (mg)     | 1.3±0.06<br>(144.4)       | 1.23±0.08<br>(136.8)      | 1.06±0.06<br>(117.5)     | 0.004                           | 0.817          | 1.25±0.1<br>(138.4)       | 1.13±0.11<br>(125.8)    | 0.88±0.06<br>(98.1)     | 0.003                           | 0.128          |
| Vitamin B2 (mg)     | 1.2±0.06<br>(119.7)       | 1.12±0.08<br>(112)        | 0.92±0.06<br>(92.4)      | 0.003                           | 0.681          | 1.35±0.15<br>(136.4)      | 0.96±0.08<br>(96.6)     | 0.93±0.07<br>(92.2)     | 0.004                           | 0.065          |
| Niacin (mg)         | 15.93±0.64<br>(113.8)     | 15.23±0.96<br>(108.8)     | 11.9±0.54<br>(85)        | <.0001                          | 0.225          | 15.18±1.33<br>(110)       | 13.29±1.2<br>(95.1)     | 11±0.61<br>(78.1)       | 0.005                           | 0.315          |

|                   |                            |                            |                            |        |       |                            |                            |                           |       |       |
|-------------------|----------------------------|----------------------------|----------------------------|--------|-------|----------------------------|----------------------------|---------------------------|-------|-------|
| Vitamin B6 (mg)   | 2±0.09<br>(124.8)          | 1.82±0.13<br>(113.5)       | 1.47±0.07<br>(92.2)        | <.0001 | 0.104 | 1.74±0.15<br>(111.4)       | 1.65±0.11<br>(103.5)       | 1.27±0.06<br>(78.4)       | 0.003 | 0.050 |
| Vitamin B12 (μg)  | 4.03±0.3<br>(167)          | 3.58±0.62<br>(149.5)       | 3.34±0.65<br>(141.1)       | 0.342  | 0.851 | 3.71±0.73<br>(164.8)       | 3.6±0.63<br>(151.4)        | 3.62±0.76<br>(147.7)      | 0.933 | 0.705 |
| Zinc (mg)         | 11.53±0.53<br>(95.9)       | 10.51±0.71<br>(87.6)       | 9.66±0.59<br>(80.8)        | 0.025  | 0.369 | 10.54±0.66<br>(89.4)       | 10.32±1.53<br>(86.2)       | 8±0.38<br>(66.2)          | 0.002 | 0.429 |
| Iron (mg)         | 15.14±0.89<br>(151.2)      | 14.07±0.95<br>(140.7)      | 11.62±0.66<br>(116.7)      | 0.002  | 0.623 | 14.86±1.07<br>(150.3)      | 12.98±1.24<br>(130)        | 11.13±0.65<br>(110.8)     | 0.004 | 0.238 |
| Sodium (mg)       | 2846.12±171.26<br>(118.1)  | 2616.02±240.68<br>(109.1)  | 2397.31±129.6<br>(101)     | 0.042  | 0.963 | 2154.03±192.34<br>(87.8)   | 2899.85±387.44<br>(120.6)  | 2379.94±169.71<br>(99.8)  | 0.382 | 0.048 |
| Potassium (mg)    | 3024.83±138.78<br>(116.3)  | 2704.26±180.05<br>(104)    | 2098.48±107.19<br>(80.8)   | <.0001 | 0.019 | 2522.13±169.4<br>(99.5)    | 2388.69±138.12<br>(92.2)   | 1851.31±112.56<br>(70.4)  | 0.001 | 0.107 |
| Phosphorus (mg)   | 1124.19±48.41<br>(140.4)   | 1014.75±60.23<br>(126.9)   | 875.34±41.09<br>(109.6)    | <.001  | 0.567 | 1042.2±54.9<br>(132.9)     | 875.67±49.97<br>(109.8)    | 824.21±44.64<br>(102.2)   | 0.002 | 0.552 |
| Calcium (mg)      | 588.45±46.4<br>(58.8)      | 588.13±51.09<br>(58.8)     | 454.36±33.62<br>(45.5)     | 0.020  | 0.951 | 641.76±51.71<br>(66)       | 470.4±38.86<br>(47.3)      | 475.68±38.93<br>(47)      | 0.008 | 0.207 |
| Magnesium (mg)    | 343.36±16.91<br>(111.9)    | 336.85±25.91<br>(109.9)    | 243.81±12.12<br>(79.8)     | <.0001 | 0.161 | 287.53±17.78<br>(98.9)     | 255.94±11.13<br>(85.7)     | 228.98±12.16<br>(75.4)    | 0.009 | 0.464 |
| SFA (mg)          | 17317.99±1159.55<br>(30.3) | 13722.46±917.49<br>(27.9)  | 11226.01±810.64<br>(29.6)  | <.0001 | 0.071 | 15603.79±1839.08<br>(31.5) | 13347.26±1530.56<br>(29.3) | 11536.41±863.58<br>(29.2) | 0.040 | 0.573 |
| MUFA (mg)         | 21407.53±1216.22<br>(37.3) | 18939.03±1567.84<br>(37.4) | 14631.32±1134.29<br>(37.1) | <.001  | 0.654 | 18700.9±1930.57<br>(37)    | 16845.2±2082.14<br>(36.5)  | 14027.84±911.88<br>(35.6) | 0.029 | 0.902 |
| PUFA (mg)         | 17825.48±1048.75<br>(31.5) | 16436.67±1211.14<br>(33.6) | 12011.48±955.1<br>(32.3)   | <.001  | 0.203 | 15731.37±1861.71<br>(30.7) | 13683.12±1512.18<br>(32.5) | 12981.71±787.5<br>(34.1)  | 0.167 | 0.450 |
| Cholesterol (mg)  | 240.03±18.67<br>(79.9)     | 193.54±21.85<br>(64.5)     | 180.69±21.68<br>(60.4)     | 0.036  | 0.598 | 271.54±52.22<br>(90)       | 174.35±30.89<br>(58.1)     | 157.72±15.97<br>(52.7)    | 0.035 | 0.098 |
| Dietary fiber (g) | 21.46±1.03<br>(98.9)       | 20.21±1.35<br>(93.2)       | 14.36±0.96<br>(66.5)       | <.0001 | 0.033 | 18.42±1.32<br>(89.9)       | 15.78±0.78<br>(75.4)       | 12.8±0.84<br>(60.3)       | 0.001 | 0.040 |

<sup>a</sup> Data are age-adjusted Mean±SEM (% RDA). The RDAs are the current dietary reference intakes (DRIs, the 8th edition) established for Taiwanese people.



<sup>b</sup> The trend test was performed by using the general linear model to test whether the mean of variable has an ordered relationship across frailty level groups after adjusting for age (Model 1) or for age and energy intake (Model 2).

**Table S5: Total energy and nutrients intakes per kilogram of body weight for the older men by frailty levels in 2014-2017 NAHSIT <sup>a</sup>**

|                        | 65-74 year-old men       |                          |                         |                                 |                | > 74 year-old men        |                          |                          |                                 |                |
|------------------------|--------------------------|--------------------------|-------------------------|---------------------------------|----------------|--------------------------|--------------------------|--------------------------|---------------------------------|----------------|
|                        | Robust                   | Prefrail                 | Frail                   | <i>P</i> for trend <sup>b</sup> |                | Robust                   | Prefrail                 | Frail                    | <i>P</i> for trend <sup>b</sup> |                |
|                        | (n=230)                  | (n=150)                  | (n=12)                  | <i>Model 1</i>                  | <i>Model 2</i> | (n=86)                   | (n=114)                  | (n=24)                   | <i>Model 1</i>                  | <i>Model 2</i> |
| Energy (Kcal/kg)       | 31.16±0.83<br>(95.4)     | 29.8±1.04<br>(91.7)      | 28.26±2.23<br>(87.9)    | 0.218                           | 0.841          | 33.62±1.82<br>(103.4)    | 31.78±1.95<br>(96.9)     | 28.79±2.5<br>(85.3)      | 0.150                           | 0.508          |
| Carbohydrate (g/kg)    | 4.15±0.13<br>(188.9)     | 4±0.14<br>(183.3)        | 4.15±0.27<br>(191.3)    | 0.990                           | 0.310          | 4.4±0.19<br>(197.9)      | 4.27±0.23<br>(190.1)     | 3.79±0.33<br>(163.6)     | 0.145                           | 0.271          |
| Protein (g/kg)         | 1.3±0.04<br>(136.1)      | 1.23±0.05<br>(129.9)     | 0.92±0.15<br>(98.3)     | 0.014                           | 0.179          | 1.43±0.09<br>(138.3)     | 1.29±0.1<br>(125)        | 1.17±0.12<br>(111.9)     | 0.131                           | 0.379          |
| Fat (g/kg)             | 1.03±0.04<br>(94.4)      | 0.97±0.06<br>(89.2)      | 0.92±0.17<br>(85.1)     | 0.537                           | 0.968          | 1.1±0.12<br>(101.7)      | 1.04±0.1<br>(95.5)       | 1±0.12<br>(89.7)         | 0.540                           | 0.395          |
| Vitamin A (µg/Kg RE)   | 18.09±1.58<br>(176.6)    | 15.62±1.94<br>(156.6)    | 18.34±4.62<br>(192.5)   | 0.960                           | 0.719          | 16.13±2.03<br>(157.4)    | 16.41±1.92<br>(158.4)    | 19.93±4.33<br>(187.4)    | 0.455                           | 0.385          |
| Vitamin C (mg/Kg)      | 2.8±0.15<br>(165)        | 2.63±0.27<br>(157.2)     | 0.99±0.38<br>(66.2)     | <.0001                          | 0.001          | 3.17±0.38<br>(182.1)     | 2.74±0.3<br>(159.1)      | 1.92±0.52<br>(117)       | 0.028                           | 0.032          |
| Vitamin D (µg/Kg)      | 0.1067±0.0095<br>(62.7)  | 0.1105±0.0115<br>(66.1)  | 0.125±0.0851<br>(77.6)  | 0.831                           | 0.759          | 0.1754±0.0265<br>(96.4)  | 0.1334±0.0237<br>(78.3)  | 0.132±0.0647<br>(94.8)   | 0.535                           | 0.716          |
| Vitamin E (mg/Kg α-TE) | 0.1531±0.0079<br>(75)    | 0.1197±0.0089<br>(60)    | 0.1151±0.038<br>(60.8)  | 0.333                           | 0.579          | 0.1671±0.0148<br>(78.8)  | 0.1292±0.0114<br>(62.7)  | 0.1337±0.0195<br>(71.1)  | 0.193                           | 0.274          |
| Vitamin B1 (mg/Kg)     | 0.0224±0.0009<br>(109.4) | 0.0216±0.0012<br>(108.3) | 0.0162±0.0033<br>(87)   | 0.073                           | 0.315          | 0.0235±0.0014<br>(116.3) | 0.0244±0.0024<br>(117.4) | 0.0227±0.0028<br>(100.4) | 0.800                           | 0.398          |
| Vitamin B2 (mg/Kg)     | 0.0203±0.0009<br>(91.9)  | 0.0184±0.0012<br>(84.7)  | 0.0189±0.0031<br>(90.1) | 0.675                           | 0.948          | 0.0217±0.0017<br>(96.5)  | 0.0196±0.0018<br>(87.5)  | 0.02±0.0035<br>(90.7)    | 0.671                           | 0.943          |
| Niacin (mg/Kg)         | 0.3072±0.015<br>(113.6)  | 0.2853±0.0171<br>(106.3) | 0.2609±0.0463<br>(98.6) | 0.335                           | 0.738          | 0.3012±0.0221<br>(109.4) | 0.3173±0.0297<br>(115)   | 0.2293±0.0273<br>(82.6)  | 0.060                           | 0.107          |

|                      |                          |                          |                          |        |       |                         |                          |                          |       |       |
|----------------------|--------------------------|--------------------------|--------------------------|--------|-------|-------------------------|--------------------------|--------------------------|-------|-------|
| Vitamin B6 (mg/Kg)   | 0.0355±0.0014<br>(130.8) | 0.031±0.002<br>(115.8)   | 0.0264±0.0081<br>(102.5) | 0.267  | 0.520 | 0.039±0.0026<br>(139.7) | 0.0317±0.0023<br>(115.1) | 0.0263±0.0031<br>(100.9) | 0.006 | 0.005 |
| Vitamin B12 (µg/Kg)  | 0.0787±0.01<br>(194.4)   | 0.0794±0.0137<br>(196.5) | 0.1042±0.0449<br>(260.2) | 0.578  | 0.483 | 0.0743±0.0108<br>(181)  | 0.061±0.0087<br>(147.1)  | 0.0468±0.009<br>(108.3)  | 0.072 | 0.202 |
| Zinc (mg/kg)         | 0.2±0.01<br>(79.1)       | 0.19±0.01<br>(75.8)      | 0.15±0.02<br>(61.2)      | 0.034  | 0.292 | 0.23±0.02<br>(90.1)     | 0.19±0.01<br>(74.5)      | 0.17±0.02<br>(63.2)      | 0.029 | 0.021 |
| Iron (mg/kg)         | 0.25±0.01<br>(147.9)     | 0.21±0.01<br>(126.9)     | 0.2±0.02<br>(122.4)      | 0.068  | 0.322 | 0.27±0.02<br>(157.7)    | 0.23±0.01<br>(133)       | 0.24±0.04<br>(131.1)     | 0.485 | 0.853 |
| Sodium (mg/kg)       | 48.59±1.85<br>(120.5)    | 49.88±3.66<br>(123.2)    | 34.48±5.08<br>(83.6)     | 0.007  | 0.096 | 57.44±5.84<br>(137.4)   | 52.23±3.97<br>(126.5)    | 41.66±9.01<br>(105.3)    | 0.162 | 0.271 |
| Potassium (mg/kg)    | 48.91±2.08<br>(84.8)     | 40.93±2.1<br>(72.1)      | 34.61±6.61<br>(63.7)     | 0.040  | 0.206 | 52.53±3.82<br>(89)      | 43.06±2.83<br>(73.6)     | 41.27±7.43<br>(72.5)     | 0.226 | 0.303 |
| Phosphorus (mg/kg)   | 19.31±0.64<br>(142.7)    | 17.77±0.74<br>(132.6)    | 13.66±1.72<br>(104.5)    | 0.002  | 0.090 | 21.84±2.08<br>(157.9)   | 18.91±1.38<br>(137.2)    | 17.54±2.13<br>(128.5)    | 0.192 | 0.430 |
| Calcium (mg/kg)      | 9.99±0.63<br>(58.9)      | 7.96±0.66<br>(47.7)      | 6.04±0.79<br>(38.1)      | <.001  | 0.009 | 10.61±1.05<br>(61.2)    | 9.55±0.97<br>(55.5)      | 10.28±2.6<br>(60.7)      | 0.913 | 0.755 |
| Magnesium (mg/kg)    | 5.72±0.24<br>(94.8)      | 4.5±0.24<br>(75.4)       | 3.46±0.42<br>(60.4)      | <.0001 | 0.007 | 6.5±0.7<br>(108.4)      | 4.94±0.3<br>(81.8)       | 5.22±0.86<br>(84.2)      | 0.266 | 0.390 |
| SFA (mg/kg)          | 291.28±11.9<br>(28.6)    | 301.08±16.15<br>(31.7)   | 384.11±110.51<br>(38.8)  | 0.405  | 0.182 | 317.96±32.85<br>(29.3)  | 348.03±32.57<br>(33.7)   | 311.26±36.63<br>(32.1)   | 0.893 | 0.151 |
| MUFA (mg/kg)         | 381.9±16.65<br>(37)      | 364.3±21<br>(37.3)       | 292.41±41.9<br>(33.4)    | 0.051  | 0.230 | 418.35±50.76<br>(37)    | 399.09±41.26<br>(37.4)   | 389.38±50.94<br>(38.5)   | 0.692 | 0.290 |
| PUFA (mg/kg)         | 340.16±15.92<br>(33.2)   | 294.9±22.9<br>(30.2)     | 237.47±38.39<br>(27.2)   | 0.013  | 0.165 | 361.67±40.09<br>(33.1)  | 288.98±32.73<br>(28)     | 289.48±50.45<br>(28.5)   | 0.282 | 0.829 |
| Cholesterol (mg/kg)  | 3.85±0.19<br>(76.4)      | 4.35±0.32<br>(86.1)      | 2.46±0.87<br>(47.7)      | 0.122  | 0.225 | 3.95±0.36<br>(75.9)     | 4.09±0.43<br>(79.1)      | 3.46±0.62<br>(68.4)      | 0.518 | 0.951 |
| Dietary fiber (g/kg) | 0.34±0.02<br>(74.6)      | 0.25±0.02<br>(54.8)      | 0.22±0.03<br>(51.2)      | <.001  | 0.018 | 0.36±0.03<br>(76.8)     | 0.29±0.02<br>(61.6)      | 0.29±0.04<br>(62.2)      | 0.204 | 0.305 |

<sup>a</sup> Data are age-adjusted Mean±SEM (% RDA). The RDAs are the current dietary reference intakes (DRIs, the 8th edition) established for Taiwanese people.

<sup>b</sup> The trend test was performed by using the general linear model to test whether the mean of variable has an ordered relationship across frailty level groups after adjusting for age (Model 1) or for age and energy intake (Model 2).

**Table S6: Total energy and nutrients intakes per kilogram of body weight for the older men by stages of cognitive ability in 2014-2017 NAHSIT <sup>a</sup>**

|                        | 65-74 year-old men       |                          |                          |                                 |                | > 74 year-old men        |                         |                         |                                 |                |
|------------------------|--------------------------|--------------------------|--------------------------|---------------------------------|----------------|--------------------------|-------------------------|-------------------------|---------------------------------|----------------|
|                        | Normal cognition         | Mild cognitive           | Cognitive                | <i>P</i> for trend <sup>b</sup> |                | Normal cognition         | Mild cognitive          | Cognitive               | <i>P</i> for trend <sup>b</sup> |                |
|                        | (n=266)                  | impairment<br>(n=156)    | impairment<br>(n=51)     | <i>Model 1</i>                  | <i>Model 2</i> | (n=100)                  | impairment<br>(n=96)    | impairment<br>(n=86)    | <i>Model 1</i>                  | <i>Model 2</i> |
| Energy (Kcal/kg)       | 31±0.8<br>(100.2)        | 28.34±1.14<br>(92.9)     | 28.82±2.68<br>(80.8)     | 0.472                           | 0.767          | 33.7±2.07<br>(93.5)      | 32.15±1.79<br>(79.5)    | 27.48±1.44<br>(75.6)    | 0.020                           | 0.072          |
| Carbohydrate (g/kg)    | 4.16±0.13<br>(169.5)     | 3.8±0.18<br>(156.7)      | 3.92±0.26<br>(143.3)     | 0.434                           | 0.907          | 4.49±0.22<br>(157.7)     | 4.39±0.2<br>(128.6)     | 3.7±0.16<br>(117.9)     | 0.005                           | 0.012          |
| Protein (g/kg)         | 1.28±0.04<br>(133.2)     | 1.16±0.05<br>(124.1)     | 1.19±0.16<br>(97.8)      | 0.579                           | 0.983          | 1.44±0.11<br>(115.2)     | 1.29±0.07<br>(96.1)     | 1.09±0.08<br>(89.1)     | 0.018                           | 0.052          |
| Fat (g/kg)             | 1.01±0.04<br>(95.8)      | 0.93±0.05<br>(86.2)      | 0.9±0.15<br>(70.6)       | 0.487                           | 0.790          | 1.09±0.11<br>(80)        | 1.01±0.11<br>(76.3)     | 0.92±0.08<br>(78.3)     | 0.239                           | 0.489          |
| Vitamin A (µg/Kg RE)   | 17.4±1.44<br>(210.9)     | 16.27±2.02<br>(231.1)    | 12.29±3.33<br>(303)      | 0.180                           | 0.172          | 17.19±1.77<br>(361.7)    | 17.73±1.65<br>(151.7)   | 14.52±1.79<br>(156.3)   | 0.271                           | 0.406          |
| Vitamin C (mg/Kg)      | 2.63±0.14<br>(186.8)     | 2.39±0.2<br>(151.5)      | 2.41±0.43<br>(87.7)      | 0.619                           | 0.898          | 3.36±0.3<br>(143.4)      | 2.65±0.28<br>(107.4)    | 2.31±0.29<br>(115.2)    | 0.012                           | 0.024          |
| Vitamin D (µg/Kg)      | 0.1115±0.01<br>(55.5)    | 0.1107±0.012<br>(61.8)   | 0.0945±0.031<br>(39.6)   | 0.616                           | 0.764          | 0.1797±0.0304<br>(47.9)  | 0.1315±0.0217<br>(45.1) | 0.1181±0.0226<br>(38.6) | 0.116                           | 0.237          |
| Vitamin E (mg/Kg α-TE) | 0.1474±0.0065<br>(65.7)  | 0.1196±0.0065<br>(60.8)  | 0.1113±0.0162<br>(64.9)  | 0.056                           | 0.016          | 0.1493±0.0108<br>(54)    | 0.1425±0.0123<br>(51.3) | 0.1282±0.0109<br>(44.3) | 0.150                           | 0.495          |
| Vitamin B1 (mg/Kg)     | 0.0226±0.001<br>(132.8)  | 0.0193±0.0011<br>(123.4) | 0.0199±0.0025<br>(112.6) | 0.384                           | 0.537          | 0.0259±0.0023<br>(112.6) | 0.0226±0.0011<br>(99)   | 0.0211±0.0016<br>(91.7) | 0.093                           | 0.362          |
| Vitamin B2 (mg/Kg)     | 0.0204±0.0011<br>(106.9) | 0.0174±0.0009<br>(106.4) | 0.0156±0.0023<br>(109.4) | 0.067                           | 0.013          | 0.0199±0.001<br>(112)    | 0.0209±0.0014<br>(79)   | 0.0189±0.0023<br>(80.3) | 0.690                           | 0.728          |
| Niacin (mg/Kg)         | 0.3058±0.014             | 0.2653±0.0174            | 0.267±0.0334             | 0.282                           | 0.511          | 0.3393±0.0292            | 0.2776±0.0243           | 0.238±0.0213            | 0.007                           | 0.013          |

|                      |               |               |              |       |       |               |               |               |        |        |
|----------------------|---------------|---------------|--------------|-------|-------|---------------|---------------|---------------|--------|--------|
|                      | (104.5)       | (97)          | (62.5)       |       |       | (97.1)        | (74.4)        | (74.4)        |        |        |
| Vitamin B6 (mg/Kg)   | 0.0348±0.0014 | 0.0307±0.0019 | 0.0292±0.004 | 0.197 | 0.320 | 0.0378±0.0031 | 0.0326±0.0016 | 0.0287±0.0021 | 0.025  | 0.042  |
|                      | (110.7)       | (106.6)       | (76.8)       |       |       | (100.9)       | (79.9)        | (73.5)        |        |        |
| Vitamin B12 (µg/Kg)  | 0.0829±0.013  | 0.0626±0.0059 | 0.0568±0.014 | 0.184 | 0.323 | 0.0744±0.0107 | 0.059±0.0069  | 0.0529±0.0091 | 0.113  | 0.308  |
|                      | (138.2)       | (145.6)       | (71.9)       |       |       | (181.9)       | (134.3)       | (76.6)        |        |        |
| Zinc (mg/kg)         | 0.2±0.01      | 0.18±0.01     | 0.19±0.02    | 0.671 | 0.449 | 0.21±0.01     | 0.21±0.01     | 0.17±0.01     | 0.019  | 0.125  |
|                      | (86.4)        | (79.3)        | (59.2)       |       |       | (82.5)        | (62.6)        | (55.3)        |        |        |
| Iron (mg/kg)         | 0.24±0.01     | 0.21±0.01     | 0.21±0.03    | 0.366 | 0.540 | 0.26±0.01     | 0.25±0.02     | 0.21±0.02     | 0.035  | 0.229  |
|                      | (136.3)       | (131.5)       | (105.3)      |       |       | (130.7)       | (103.2)       | (90.4)        |        |        |
| Sodium (mg/kg)       | 47.12±1.89    | 52.2±3.29     | 39.2±5.34    | 0.140 | 0.126 | 53.86±4.99    | 49.07±4.73    | 46.11±4.37    | 0.199  | 0.742  |
|                      | (103.7)       | (104.7)       | (80.9)       |       |       | (86.4)        | (98.1)        | (75.7)        |        |        |
| Potassium (mg/kg)    | 47.24±1.83    | 40.28±2.02    | 36.86±5.49   | 0.098 | 0.028 | 51.26±2.81    | 45.51±2.66    | 39.29±3.65    | 0.014  | 0.041  |
|                      | (103.7)       | (95.8)        | (64.3)       |       |       | (94.2)        | (70.8)        | (62)          |        |        |
| Phosphorus (mg/kg)   | 19.06±0.67    | 16.65±0.67    | 16.87±1.97   | 0.323 | 0.355 | 20.27±1.34    | 21.75±1.56    | 16.33±1.16    | 0.036  | 0.362  |
|                      | (127.6)       | (117.5)       | (91.5)       |       |       | (110.9)       | (93.5)        | (81.9)        |        |        |
| Calcium (mg/kg)      | 9.49±0.6      | 7.83±0.54     | 8.07±1.57    | 0.409 | 0.526 | 9.88±0.88     | 10.91±0.82    | 9.35±1.18     | 0.727  | 0.622  |
|                      | (55.6)        | (54.9)        | (45.3)       |       |       | (57)          | (42)          | (34.7)        |        |        |
| Magnesium (mg/kg)    | 5.56±0.23     | 4.4±0.21      | 4.06±0.55    | 0.023 | 0.001 | 5.81±0.28     | 6.05±0.58     | 4.49±0.39     | 0.006  | 0.173  |
|                      | (104.8)       | (90.8)        | (64.1)       |       |       | (89)          | (73.9)        | (58.6)        |        |        |
| SFA (mg/kg)          | 301.54±11.94  | 283.14±16.95  | 273.53±42.69 | 0.559 | 0.989 | 339.18±32.5   | 298.63±33.9   | 290.05±27.98  | 0.278  | 0.593  |
|                      | (29.1)        | (30.2)        | (26.9)       |       |       | (29.7)        | (30.4)        | (30.5)        |        |        |
| MUFA (mg/kg)         | 381.37±14.96  | 346.5±19.09   | 342.66±61.77 | 0.575 | 0.983 | 414.19±46.48  | 390.62±50.02  | 341.58±33.91  | 0.237  | 0.624  |
|                      | (38)          | (36.6)        | (34.1)       |       |       | (37.3)        | (35.8)        | (35.9)        |        |        |
| PUFA (mg/kg)         | 320.44±13.88  | 289.01±23.23  | 276±47.07    | 0.398 | 0.612 | 333.27±36.71  | 313.34±38.68  | 280.4±28.88   | 0.286  | 0.518  |
|                      | (32)          | (32.4)        | (37.1)       |       |       | (32.1)        | (32.6)        | (32.8)        |        |        |
| Cholesterol (mg/kg)  | 3.87±0.22     | 4.25±0.32     | 3.63±0.49    | 0.621 | 0.990 | 3.96±0.4      | 3.75±0.34     | 3.32±0.36     | 0.255  | 0.767  |
|                      | (64.8)        | (77.2)        | (47.1)       |       |       | (59.8)        | (47.1)        | (56.9)        |        |        |
| Dietary fiber (g/kg) | 0.32±0.02     | 0.25±0.01     | 0.24±0.04    | 0.040 | 0.006 | 0.37±0.02     | 0.33±0.03     | 0.22±0.02     | <.0001 | <.0001 |
|                      | (92.6)        | (81.1)        | (49.6)       |       |       | (75.6)        | (61.7)        | (57.2)        |        |        |

<sup>a</sup> Data are age-adjusted Mean±SEM (% RDA). The RDAs are the current dietary reference intakes (DRIs, the 8th edition) established for Taiwanese people.

<sup>b</sup> The trend test was performed by using the general linear model to test whether the mean of variable has an ordered relationship across frailty level groups after adjusting for age (Model 1) or for age and energy intake (Model 2).

**Table S7: Total energy and nutrients intakes per kilogram of body weight for the older women by frailty levels in 2014-2017 NAHSIT <sup>a</sup>**

|                        | 65-74 year-old women     |                         |                          |                                 |                | > 74 year-old women      |                          |                          |                                 |                |
|------------------------|--------------------------|-------------------------|--------------------------|---------------------------------|----------------|--------------------------|--------------------------|--------------------------|---------------------------------|----------------|
|                        | Robust                   | Prefrail                | Frail                    | <i>P</i> for trend <sup>b</sup> |                | Robust                   | Prefrail                 | Frail                    | <i>P</i> for trend <sup>b</sup> |                |
|                        | (n=224)                  | (n=123)                 | (n=10)                   | <i>Model 1</i>                  | <i>Model 2</i> | (n=59)                   | (n=103)                  | (n=24)                   | <i>Model 1</i>                  | <i>Model 2</i> |
| Energy (Kcal/Kg)       | 30.62±1.05<br>(95.1)     | 28.4±1.18<br>(87)       | 24.72±2.12<br>(88.6)     | 0.014                           | 0.109          | 27.75±1.53<br>(103.3)    | 23.82±1.3<br>(97.9)      | 23.39±3.44<br>(83.6)     | 0.248                           | 0.825          |
| Carbohydrate (g/Kg)    | 4.27±0.12<br>(189.8)     | 3.98±0.16<br>(173.4)    | 3.74±0.26<br>(179.3)     | 0.067                           | 0.992          | 4.03±0.23<br>(201.6)     | 3.34±0.18<br>(195.2)     | 3.24±0.47<br>(164.6)     | 0.132                           | 0.263          |
| Protein (g/Kg)         | 1.29±0.05<br>(135.2)     | 1.21±0.08<br>(121.2)    | 0.96±0.14<br>(124.1)     | 0.025                           | 0.135          | 1.14±0.07<br>(139.4)     | 0.96±0.06<br>(124.4)     | 0.93±0.12<br>(105.5)     | 0.119                           | 0.661          |
| Fat (g/Kg)             | 0.98±0.05<br>(93.5)      | 0.88±0.07<br>(85.2)     | 0.7±0.11<br>(82.5)       | 0.022                           | 0.186          | 0.8±0.07<br>(100.3)      | 0.76±0.06<br>(92.4)      | 0.78±0.17<br>(84.1)      | 0.892                           | 0.154          |
| Vitamin A (µg/Kg RE)   | 20.48±1.76<br>(169.4)    | 22.51±3.91<br>(163.5)   | 29.24±19.58<br>(127)     | 0.657                           | 0.545          | 33.85±13.98<br>(167)     | 14.93±2.41<br>(170.9)    | 21.19±4.82<br>(139.8)    | 0.325                           | 0.478          |
| Vitamin C (mg/Kg)      | 3.61±0.26<br>(154.7)     | 2.97±0.28<br>(143.3)    | 1.85±0.24<br>(146)       | <.0001                          | <.001          | 2.83±0.34<br>(195.4)     | 2.14±0.23<br>(153.2)     | 2.4±0.78<br>(133.9)      | 0.632                           | 0.701          |
| Vitamin D (µg/Kg)      | 0.1083±0.0113<br>(65.4)  | 0.1195±0.0154<br>(66.3) | 0.0729±0.0187<br>(57.6)  | 0.152                           | 0.446          | 0.0909±0.0179<br>(102.1) | 0.0897±0.0133<br>(77.5)  | 0.0887±0.0262<br>(69.9)  | 0.943                           | 0.575          |
| Vitamin E (mg/Kg α-TE) | 0.1535±0.0093<br>(72.3)  | 0.1412±0.0105<br>(59.8) | 0.1485±0.0288<br>(56.7)  | 0.873                           | 0.492          | 0.1265±0.0155<br>(71.7)  | 0.1228±0.0112<br>(69.1)  | 0.1137±0.0214<br>(62.3)  | 0.639                           | 0.583          |
| Vitamin B1 (mg/Kg)     | 0.0232±0.0012<br>(110.6) | 0.0217±0.0015<br>(96.7) | 0.0205±0.0028<br>(101.1) | 0.371                           | 0.855          | 0.0203±0.0018<br>(126.2) | 0.0178±0.0013<br>(108.5) | 0.0164±0.0038<br>(101.2) | 0.357                           | 0.739          |
| Vitamin B2 (mg/Kg)     | 0.0208±0.0011<br>(92.2)  | 0.0207±0.0017<br>(80.4) | 0.0214±0.0041<br>(73.4)  | 0.890                           | 0.370          | 0.0222±0.0024<br>(88.6)  | 0.0158±0.0011<br>(93)    | 0.0166±0.0026<br>(84.2)  | 0.112                           | 0.321          |
| Niacin (mg/Kg)         | 0.2844±0.0112            | 0.2641±0.0149           | 0.1718±0.0179            | <.0001                          | <.001          | 0.2731±0.0281            | 0.2085±0.0173            | 0.2055±0.0271            | 0.154                           | 0.561          |

|                      |               |               |               |       |       |               |               |               |       |       |
|----------------------|---------------|---------------|---------------|-------|-------|---------------|---------------|---------------|-------|-------|
|                      | (113.3)       | (98.6)        | (99.2)        |       |       | (123.3)       | (100.4)       | (86.1)        |       |       |
| Vitamin B6 (mg/Kg)   | 0.0344±0.0017 | 0.0332±0.0024 | 0.0242±0.0026 | 0.001 | 0.170 | 0.0318±0.003  | 0.0255±0.0016 | 0.0247±0.0042 | 0.157 | 0.375 |
|                      | (128.8)       | (114.3)       | (109.5)       |       |       | (137.1)       | (118)         | (104.1)       |       |       |
| Vitamin B12 (µg/Kg)  | 0.0649±0.0055 | 0.0675±0.0074 | 0.0296±0.0073 | 0.001 | 0.009 | 0.0866±0.0192 | 0.0644±0.0148 | 0.0384±0.008  | 0.015 | 0.021 |
|                      | (204.3)       | (155.5)       | (142.6)       |       |       | (180.6)       | (142)         | (127.2)       |       |       |
| Zinc (mg/Kg)         | 0.2±0.01      | 0.19±0.01     | 0.14±0.02     | 0.015 | 0.085 | 0.19±0.02     | 0.15±0.01     | 0.14±0.02     | 0.049 | 0.102 |
|                      | (78)          | (70.6)        | (74.5)        |       |       | (83.3)        | (81.1)        | (65.7)        |       |       |
| Iron (mg/Kg)         | 0.27±0.01     | 0.26±0.03     | 0.2±0.03      | 0.069 | 0.552 | 0.25±0.02     | 0.21±0.01     | 0.2±0.03      | 0.200 | 0.431 |
|                      | (142.9)       | (124.2)       | (126.5)       |       |       | (153)         | (145.4)       | (120.3)       |       |       |
| Sodium (mg/Kg)       | 48.25±2.78    | 49.02±3.01    | 38.93±4.64    | 0.098 | 0.622 | 41.23±2.94    | 47.08±5.93    | 36.94±6.93    | 0.586 | 0.817 |
|                      | (117.5)       | (128.3)       | (94.6)        |       |       | (129.9)       | (118.7)       | (111.6)       |       |       |
| Potassium (mg/Kg)    | 52.39±2.43    | 48.5±3.81     | 32.6±5.82     | 0.002 | 0.062 | 48.17±2.97    | 36.76±2.31    | 34.21±6.51    | 0.056 | 0.084 |
|                      | (81.9)        | (70.8)        | (65.6)        |       |       | (87.6)        | (77.6)        | (66.9)        |       |       |
| Phosphorus (mg/Kg)   | 19.83±0.83    | 18.3±1.13     | 14.39±1.33    | 0.001 | 0.038 | 17.56±1.04    | 14.94±0.87    | 13.54±1.99    | 0.071 | 0.190 |
|                      | (141.1)       | (123.9)       | (126)         |       |       | (147.6)       | (157.4)       | (118)         |       |       |
| Calcium (mg/Kg)      | 10.8±0.84     | 10.7±1.42     | 8.86±2.14     | 0.403 | 0.963 | 11.13±0.88    | 8.38±0.84     | 7.57±1.74     | 0.070 | 0.167 |
|                      | (55.9)        | (46.9)        | (48.9)        |       |       | (57.3)        | (63.3)        | (54.2)        |       |       |
| Magnesium (mg/Kg)    | 6.25±0.31     | 5.44±0.42     | 3.94±0.52     | <.001 | 0.021 | 5.22±0.31     | 4.42±0.32     | 3.8±0.65      | 0.057 | 0.101 |
|                      | (92)          | (73.8)        | (68.9)        |       |       | (97.1)        | (99.7)        | (73.9)        |       |       |
| SFA (mg/Kg)          | 279.44±16.29  | 258.51±18.4   | 188.48±29.76  | 0.009 | 0.121 | 238.85±21.31  | 229.82±18.43  | 227.13±58.06  | 0.850 | 0.345 |
|                      | (29.9)        | (30.6)        | (30.5)        |       |       | (31.4)        | (30.1)        | (32.2)        |       |       |
| MUFA (mg/Kg)         | 375.69±21     | 322.09±22.25  | 236.24±40.4   | 0.003 | 0.005 | 295.94±23.63  | 281.21±25.87  | 285.49±65.49  | 0.881 | 0.173 |
|                      | (37.1)        | (37.5)        | (37.7)        |       |       | (37.2)        | (37.7)        | (36.9)        |       |       |
| PUFA (mg/Kg)         | 312.63±19.43  | 289.19±30.41  | 266.15±48.38  | 0.381 | 0.554 | 261.77±25.22  | 243.99±21.23  | 258.63±52.14  | 0.958 | 0.160 |
|                      | (31.9)        | (31)          | (30.9)        |       |       | (30.7)        | (31.4)        | (30)          |       |       |
| Cholesterol (mg/Kg)  | 3.78±0.31     | 4.5±0.5       | 2.76±1.12     | 0.380 | 0.807 | 3.54±0.59     | 2.82±0.36     | 3.54±0.72     | 0.996 | 0.349 |
|                      | (77)          | (83.8)        | (70.9)        |       |       | (76.2)        | (72.6)        | (64.3)        |       |       |
| Dietary fiber (g/Kg) | 0.39±0.02     | 0.34±0.03     | 0.21±0.04     | <.001 | 0.006 | 0.31±0.02     | 0.26±0.02     | 0.27±0.04     | 0.445 | 0.915 |
|                      | (70.6)        | (55.4)        | (53.1)        |       |       | (79.2)        | (70.6)        | (47)          |       |       |

<sup>a</sup> Data are age-adjusted Mean±SEM (% RDA). The RDAs are the current dietary reference intakes (DRIs, the 8th edition) established for Taiwanese people.

<sup>b</sup> The trend test was performed by using the general linear model to test whether the mean of variable has an ordered relationship across frailty level groups after adjusting for age (Model 1) or for age and energy intake (Model 2).

**Table S8: Total energy and nutrients intakes per kilogram of body weight for the older women by stages of cognitive ability in 2014-2017 NAHSIT <sup>a</sup>**

|                        | 65-74 year-old women     |                          |                          |                                 |                | > 74 year-old women      |                          |                         |                                 |                |
|------------------------|--------------------------|--------------------------|--------------------------|---------------------------------|----------------|--------------------------|--------------------------|-------------------------|---------------------------------|----------------|
|                        | Normal cognition         | Mild cognitive           | Cognitive                | <i>P</i> for trend <sup>b</sup> |                | Normal cognition         | Mild cognitive           | Cognitive               | <i>P</i> for trend <sup>b</sup> |                |
|                        | (n=189)                  | impairment<br>(n=152)    | impairment<br>(n=105)    | <i>Model 1</i>                  | <i>Model 2</i> | (n=36)                   | impairment<br>(n=78)     | impairment<br>(n=151)   | <i>Model 1</i>                  | <i>Model 2</i> |
| Energy (Kcal/Kg)       | 31.19±1.04<br>(102.1)    | 27.51±1.66<br>(90.1)     | 25.22±1.12<br>(82.8)     | <.001                           | 0.788          | 29.33±1.91<br>(99.2)     | 26.75±1.45<br>(89.5)     | 22.52±1.22<br>(74.4)    | 0.007                           | 0.196          |
| Carbohydrate (g/Kg)    | 4.34±0.12<br>(172.1)     | 3.78±0.21<br>(149.5)     | 3.75±0.17<br>(146.9)     | 0.006                           | 0.593          | 3.99±0.25<br>(157.1)     | 3.68±0.2<br>(142.2)      | 3.26±0.21<br>(123.7)    | 0.047                           | 0.513          |
| Protein (g/Kg)         | 1.32±0.06<br>(136)       | 1.2±0.08<br>(123.3)      | 1.02±0.07<br>(104.8)     | 0.001                           | 0.519          | 1.25±0.07<br>(127.5)     | 1.12±0.1<br>(112.4)      | 0.91±0.04<br>(89.8)     | <.001                           | 0.374          |
| Fat (g/Kg)             | 1±0.05<br>(98.4)         | 0.89±0.07<br>(87.4)      | 0.67±0.06<br>(66.9)      | <.0001                          | 0.231          | 0.91±0.08<br>(91.3)      | 0.87±0.08<br>(87.1)      | 0.66±0.05<br>(66.4)     | 0.018                           | 0.972          |
| Vitamin A (µg/Kg RE)   | 21.64±2.16<br>(222.5)    | 21.07±2.62<br>(216.7)    | 17.03±2.77<br>(174.4)    | 0.167                           | 0.908          | 33.76±16.06<br>(361)     | 18.23±1.51<br>(187.4)    | 15.9±1.95<br>(148.1)    | 0.264                           | 0.365          |
| Vitamin C (mg/Kg)      | 3.63±0.25<br>(187.4)     | 3.21±0.31<br>(165.3)     | 2.21±0.28<br>(111.2)     | <.001                           | 0.028          | 2.72±0.33<br>(137.9)     | 2.59±0.29<br>(129.8)     | 1.96±0.2<br>(97.2)      | 0.051                           | 0.122          |
| Vitamin D (µg/Kg)      | 0.1114±0.0119<br>(57)    | 0.1075±0.0164<br>(55.3)  | 0.0963±0.0196<br>(49.8)  | 0.560                           | 0.725          | 0.0801±0.0138<br>(43.7)  | 0.1225±0.0236<br>(62)    | 0.0812±0.0094<br>(38.9) | 0.947                           | 0.131          |
| Vitamin E (mg/Kg α-TE) | 0.1569±0.0089<br>(66.9)  | 0.14±0.0104<br>(60)      | 0.1123±0.0113<br>(48.4)  | 0.004                           | 0.279          | 0.1308±0.0148<br>(56.7)  | 0.1363±0.013<br>(57.2)   | 0.1139±0.0081<br>(46.4) | 0.324                           | 0.483          |
| Vitamin B1 (mg/Kg)     | 0.0235±0.0012<br>(134.8) | 0.0221±0.0016<br>(125.9) | 0.0189±0.0012<br>(106.6) | 0.005                           | 0.953          | 0.0225±0.0017<br>(125.1) | 0.0215±0.0018<br>(119.4) | 0.0158±0.0012<br>(88)   | 0.004                           | 0.235          |
| Vitamin B2 (mg/Kg)     | 0.0215±0.0013<br>(110.4) | 0.0204±0.0017<br>(104.7) | 0.0161±0.0014<br>(83)    | 0.006                           | 0.594          | 0.0237±0.0025<br>(120.1) | 0.018±0.0014<br>(90.5)   | 0.016±0.001<br>(79.2)   | 0.003                           | 0.078          |

|                      |                          |                          |                          |        |       |                          |                          |                         |       |       |
|----------------------|--------------------------|--------------------------|--------------------------|--------|-------|--------------------------|--------------------------|-------------------------|-------|-------|
| Niacin (mg/Kg)       | 0.2862±0.0123<br>(105.2) | 0.2733±0.0196<br>(100.3) | 0.2061±0.0106<br>(75.2)  | <.0001 | 0.089 | 0.2934±0.0304<br>(106)   | 0.2535±0.0223<br>(90.8)  | 0.1981±0.0109<br>(70.2) | 0.004 | 0.209 |
| Vitamin B6 (mg/Kg)   | 0.0359±0.0017<br>(115.6) | 0.0321±0.0025<br>(103.2) | 0.0258±0.0016<br>(82.3)  | <.0001 | 0.053 | 0.0314±0.0022<br>(100.3) | 0.0322±0.0022<br>(101.1) | 0.0231±0.0015<br>(71)   | 0.004 | 0.247 |
| Vitamin B12 (µg/Kg)  | 0.0719±0.0052<br>(153.1) | 0.0614±0.0113<br>(131.1) | 0.0564±0.0144<br>(122.3) | 0.324  | 0.994 | 0.0674±0.0145<br>(145.8) | 0.0668±0.0138<br>(140.3) | 0.056±0.012<br>(114.1)  | 0.555 | 0.972 |
| Zinc (mg/Kg)         | 0.2±0.01<br>(87.3)       | 0.19±0.01<br>(80.3)      | 0.17±0.01<br>(72.1)      | 0.017  | 0.608 | 0.2±0.01<br>(84.7)       | 0.19±0.02<br>(80.4)      | 0.14±0.01<br>(58)       | 0.001 | 0.128 |
| Iron (mg/Kg)         | 0.27±0.02<br>(137.9)     | 0.25±0.02<br>(129)       | 0.21±0.02<br>(109)       | 0.025  | 0.915 | 0.29±0.03<br>(149.2)     | 0.22±0.01<br>(110.8)     | 0.2±0.01<br>(95.4)      | 0.004 | 0.161 |
| Sodium (mg/Kg)       | 48.73±2.37<br>(104.3)    | 45.48±3.95<br>(97.3)     | 41.76±2.55<br>(89.3)     | 0.037  | 0.802 | 35.84±2.77<br>(78.3)     | 46.01±4.89<br>(96.7)     | 42.51±3.88<br>(86.8)    | 0.168 | 0.003 |
| Potassium (mg/Kg)    | 53.66±2.66<br>(106.2)    | 48.74±3.66<br>(96.4)     | 37.16±2.65<br>(73)       | <.0001 | 0.039 | 46.31±3.79<br>(91.9)     | 45.47±2.49<br>(88)       | 33.41±1.97<br>(62.9)    | 0.004 | 0.141 |
| Phosphorus (mg/Kg)   | 20.03±0.9<br>(128.8)     | 18.28±1.2<br>(117.4)     | 15.46±0.95<br>(98.8)     | 0.001  | 0.500 | 19.42±1.12<br>(123.4)    | 16.72±0.99<br>(105)      | 14.32±0.79<br>(88.6)    | 0.001 | 0.238 |
| Calcium (mg/Kg)      | 10.74±0.88<br>(55.2)     | 10.77±1.02<br>(55.4)     | 7.87±0.75<br>(40.2)      | 0.014  | 0.635 | 12.04±1.19<br>(62.6)     | 8.51±0.63<br>(43.1)      | 8.65±0.77<br>(42.1)     | 0.016 | 0.246 |
| Magnesium (mg/Kg)    | 6.14±0.31<br>(103)       | 5.96±0.49<br>(99.8)      | 4.42±0.33<br>(73.6)      | <.001  | 0.339 | 5.61±0.45<br>(96.3)      | 4.83±0.26<br>(81.2)      | 4.11±0.27<br>(67.2)     | 0.007 | 0.235 |
| SFA (mg/Kg)          | 296.13±16.85<br>(30.1)   | 247.07±19.25<br>(28.1)   | 194.51±16.57<br>(29.7)   | <.0001 | 0.075 | 270.29±24.37<br>(30)     | 265.71±24.87<br>(30.3)   | 193.99±15.65<br>(29.6)  | 0.014 | 0.700 |
| MUFA (mg/Kg)         | 380.35±21.39<br>(37.5)   | 343.23±32.32<br>(37.7)   | 250.27±22.77<br>(36.4)   | <.0001 | 0.383 | 341.43±32.59<br>(37.4)   | 326.54±32.51<br>(36.8)   | 238.35±18.1<br>(35.4)   | 0.009 | 0.597 |
| PUFA (mg/Kg)         | 319.39±19.77<br>(31.5)   | 290.93±26.82<br>(33)     | 222.09±24.79<br>(32.9)   | 0.002  | 0.576 | 294.88±35.15<br>(31.7)   | 271.96±30.2<br>(31.8)    | 225.58±18.35<br>(33.8)  | 0.101 | 0.572 |
| Cholesterol (mg/Kg)  | 4.37±0.37<br>(75)        | 3.53±0.39<br>(60.4)      | 2.9±0.35<br>(49.6)       | 0.003  | 0.144 | 4.73±0.9<br>(77.3)       | 3.17±0.48<br>(52.5)      | 2.75±0.26<br>(46.5)     | 0.033 | 0.200 |
| Dietary fiber (g/Kg) | 0.38±0.02                | 0.36±0.03                | 0.28±0.02                | 0.001  | 0.305 | 0.34±0.03                | 0.3±0.02                 | 0.24±0.02               | 0.012 | 0.182 |



(89.6) (86.1) (65) (84.3) (71) (55.9)

---

<sup>a</sup> Data are age-adjusted Mean±SEM (% RDA). The RDAs are the current dietary reference intakes (DRIs, the 8th edition) established for Taiwanese people.

<sup>b</sup> The trend test was performed by using the general linear model to test whether the mean of variable has an ordered relationship across frailty level groups after adjusting for age (Model 1) or for age and energy intake (Model 2).
